# Supplementary material
Source: PubMed Central journal article supplement (PMC8284398)
Supplement: NIHMS1719546-supplement-Materials_List.pdf [file NIHMS1719546-supplement-Materials_List.pdf]

# Vascular Casting of Adult and Early Postnatal Mouse Lungs for Micro-CT Imaging

Russell H. Knutsen<sup>1</sup>, Leah M. Gober<sup>1</sup>, Joseph R. Sukinik<sup>1</sup>, Danielle R. Donahue<sup>2</sup>, Elise K. Kronquist<sup>1</sup>, Mark D. Levin<sup>1</sup>, Sean E. McLean<sup>3</sup>, Beth A. Kozel<sup>1</sup>

<sup>1</sup>Translational Vascular Medicine Branch, National Heart Lung and Blood Institute, National Institutes of Health <sup>2</sup>Mouse Imaging Facility, National Institute of Neurological Disorders and Stroke, National Institutes of Health <sup>3</sup>Division of Pediatric Surgery, Department of Surgery, University of North Carolina at Chapel Hill

## Corresponding Author

**Beth A. Kozel**  
Beth.kozel@nih.gov

## Citation

Knutsen, R.H., Gober, L.M., Sukinik, J.R., Donahue, D.R., Kronquist, E.K., Levin, M.D., McLean, S.E., Kozel, B.A. Vascular Casting of Adult and Early Postnatal Mouse Lungs for Micro-CT Imaging. *J. Vis. Exp.* (), e61242, doi:10.3791/61242 (2020).

## Date Published

June 20, 2020

## DOI

10.3791/61242

## URL

jove.com/video/61242

## Materials

| Name                           | Company               | Catalog Number   | Comments                        |
|--------------------------------|-----------------------|------------------|---------------------------------|
| 1cc syringe                    | Becton Dickinson      | 309659           |                                 |
| 20ml Glass Scintillation Vials | Fisher                | 03-340-25P       |                                 |
| 30G Needle                     | Becton Dickinson      | 305106           |                                 |
| 50mL conical tubes             | Cornin                | 352098           | For sample Storage and scanning |
| 60cc syringe                   | Becton Dickinson      | 309653           |                                 |
| 7-0 silk suture                | Teleflex              | 103-S            |                                 |
| Analyze 12.0 Software          | AnalyzeDirect Inc.    | N/A              | Primary Software                |
| Amira 6.7 Software             | Thermo Scientific     | N/A              | Alternative Software            |
| CeramaCut Scissors 9cm         | Fine Science tools    | 14958-09         |                                 |
| Ceramic Coated Curved Forceps  | Fine Science tools    | 11272-50         |                                 |
| CO2 Tank                       | Robert's Oxygen Co.   | n/a              |                                 |
| Dual syringe pump              | Cole Parmer           | EW-74900-10      |                                 |
| Dumont Mini-Forceps            | Fine Science tools    | 11200-14         |                                 |
| Ethanol                        | Pharmco               | 111000200        |                                 |
| Formalin                       | Sigma - Life Sciences | HT501128         |                                 |
| Gauze                          | Covidien              | 441215           |                                 |
| Hemostat                       | Fine Science tools    | 13013-14         |                                 |
| Heparin (1000USP Units/ml)     | Hospira               | NDC 0409-2720-01 |                                 |
| Horos Software                 | Horos Project         | N/A              | Alternative Software            |
| induction chamber              | n/a                   | n/a              |                                 |
| Kimwipe                        | Fisher                | 06-666           | fiber optic cleaning wipe       |
| Labelling Tape                 | Fisher                | 15966            |                                 |
| Magnetic Base                  | Kanetec               | N/A              |                                 |
| Micro-CT system                | PerkinElmer           | Quantum GX       |                                 |

|                                    |                          |                |                                                         |
|------------------------------------|--------------------------|----------------|---------------------------------------------------------|
| Microfil (Polymer Compound)        | Flowech Inc.             | Kit B - MV-122 | 8 oz. of MV compound; 8 oz. of diluent; MV-Curing Agent |
| Micromanipulator                   | Stoelting                | 56131          |                                                         |
| Monoject 1/2 ml Insulin Syringe    | Covidien                 | 1188528012     |                                                         |
| Octagon Forceps Straight Teeth     | Fine Science tools       | 11042-08       |                                                         |
| Parafilm                           | Bemis company, Inc.      | #PM999         |                                                         |
| PE-10 tubing                       | Instech                  | BTPE-10        |                                                         |
| Phospahte buffered Saline          | BioRad                   | #161-0780      |                                                         |
| Ring Stand                         | Fisher                   | S13747         | Height 24in.                                            |
| Sodium Nitroprusside               | sigma                    | 71778-25G      |                                                         |
| Steel Plate                        | N/A                      | N/A            | 16 x 16 in. area, 1/16 in thick                         |
| Straight Spring Scissors           | Fine Science tools       | 15000-08       |                                                         |
| SURFLO 24G Teflon I.V. Catheter    | Santa Cruz Biotechnology | 360103         |                                                         |
| Surgical Board                     | Fisher                   | 12-587-20      | This is a converted slide holder                        |
| Universal 3-prong clamp            | Fisher                   | S24280         |                                                         |
| Winged Inf. Set 25X3/4, 12" Tubing | Nipro                    | PR25G19        |                                                         |
| Zeiss Stemi-508 Dissection Scope   | Zeiss                    | n/a            |                                                         |
